# Supplementary material for: Loss of cilia causes embryonic lung hypoplasia, liver fibrosis, and cholestasis in the talpid3 ciliopathy mutant
Source: PubMed Central journal article supplement (PMC4154951; doi:10.4161/org.28819), 2014-04-17
Supplement: org-10-177-s01.pdf [file org-10-177-s01.pdf]

## **Supplemental Material to:**

**Megan G Davey, Lynn McTeir, Andrew M Barrie,  
Lucy J Freem, and Louise A Stephen**

**Loss of cilia causes embryonic lung hypoplasia, liver  
fibrosis and cholestasis in the *talpid*<sup>3</sup> ciliopathy mutant**

**Organogenesis 2014; 10(2)**

**<http://dx.doi.org/10.4161/org.28819>**

**[http://www.landesbioscience.com/journals/organogenesis/  
article/28819/](http://www.landesbioscience.com/journals/organogenesis/article/28819/)**

E6 SHH

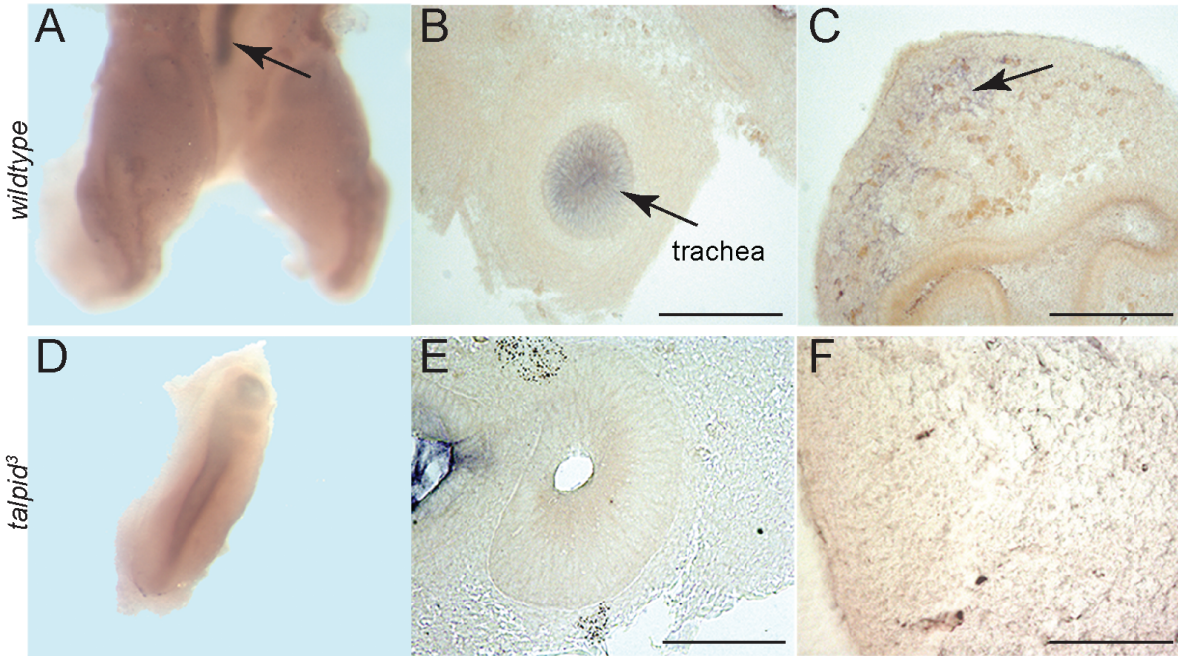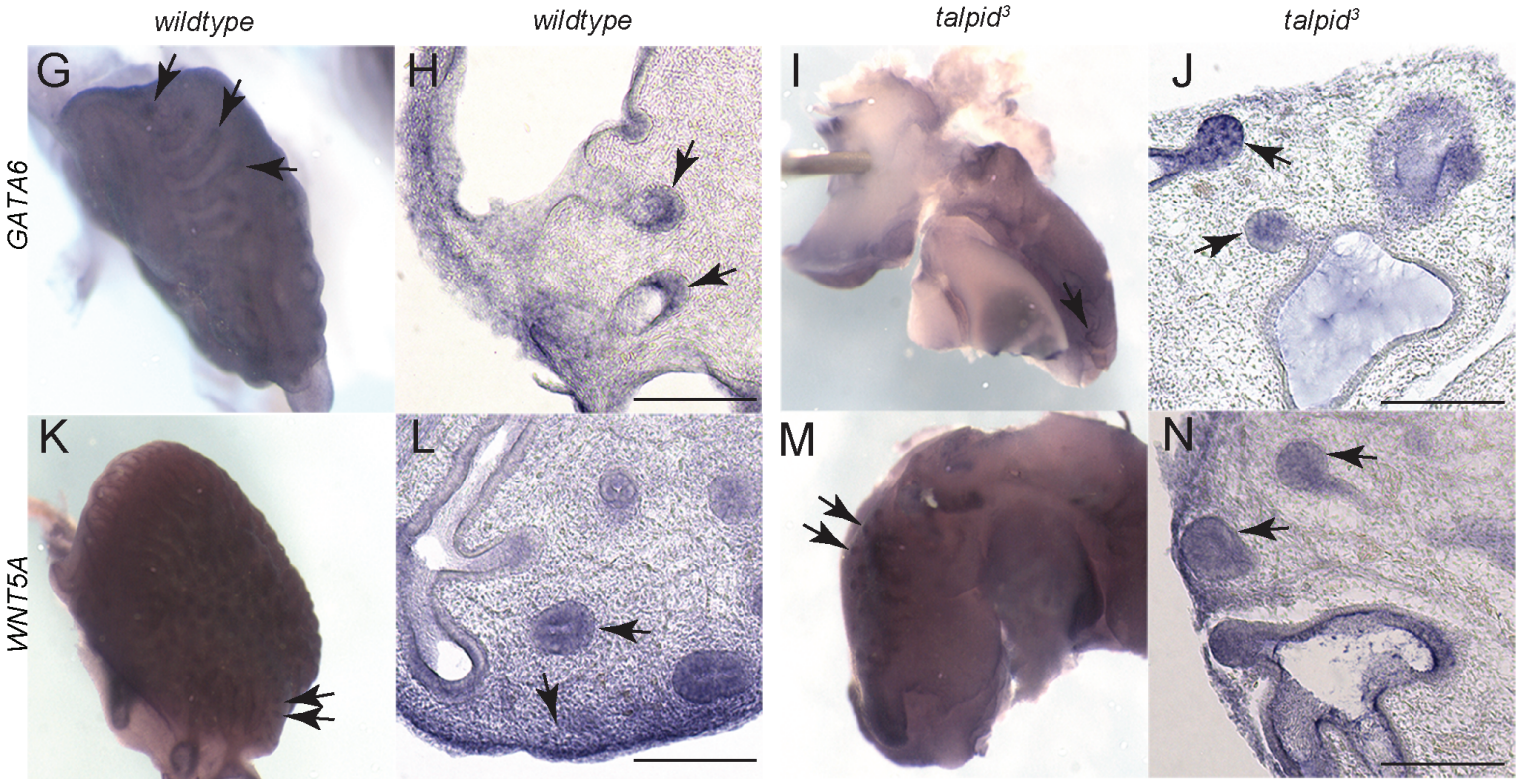

**Supplemental Figure 1:**  
***SHH* expression is lost in *talpid*<sup>3</sup> lung development but distal epithelial markers are present**

**Figure S1.** SHH expression is lost in *talpid<sup>3</sup>* lung development but distal epithelial markers are present. RNA in situ hybridisation for SHH (**A-F**), GATA6 (**G-J**), WNT5A (**K-N**). SHH expression in the wt trachea (arrow, **A** and **B**) and distal lung mesenchyme (**C**). SHH expression is not observed in *talpid<sup>3</sup>* wholemount lung (purple stain is non-specific trapping in epithelial lumen, **D**), lung epithelium (**E**), or distal mesenchyme (**F**). GATA6 expression in wt wholemount lung, arrows indicating epithelium (**G**), in section expression is seen in distal mesenchyme and distal epithelial buds (arrows, **H**). GATA6 expression in *talpid<sup>3</sup>* wholemount lung (**I**), in section, arrows indicating expression in distal buds, expression is not seen in mesenchyme (**J**). WNT5A expression in wt wholemount lung, arrows indicating epithelium (**K**), in section expression is seen in distal mesenchyme and distal epithelial buds (arrows, **L**). WNT5A expression in *talpid<sup>3</sup>* wholemount lung (arrows, **M**), in section, arrows indicating expression in distal buds, expression is reduced in mesenchyme (**N**).
